# Supplementary material for: Ag-doped Ni/SiO 2 catalysts for the synthesis of aromatic amines from aromatic phenol
Source: Royal Society of Chemistry journal article supplement (doi:10.1039/d5re00055f), 2025-01-01
Supplement: d5re00055f1.pdf [file d5re00055f1.pdf]

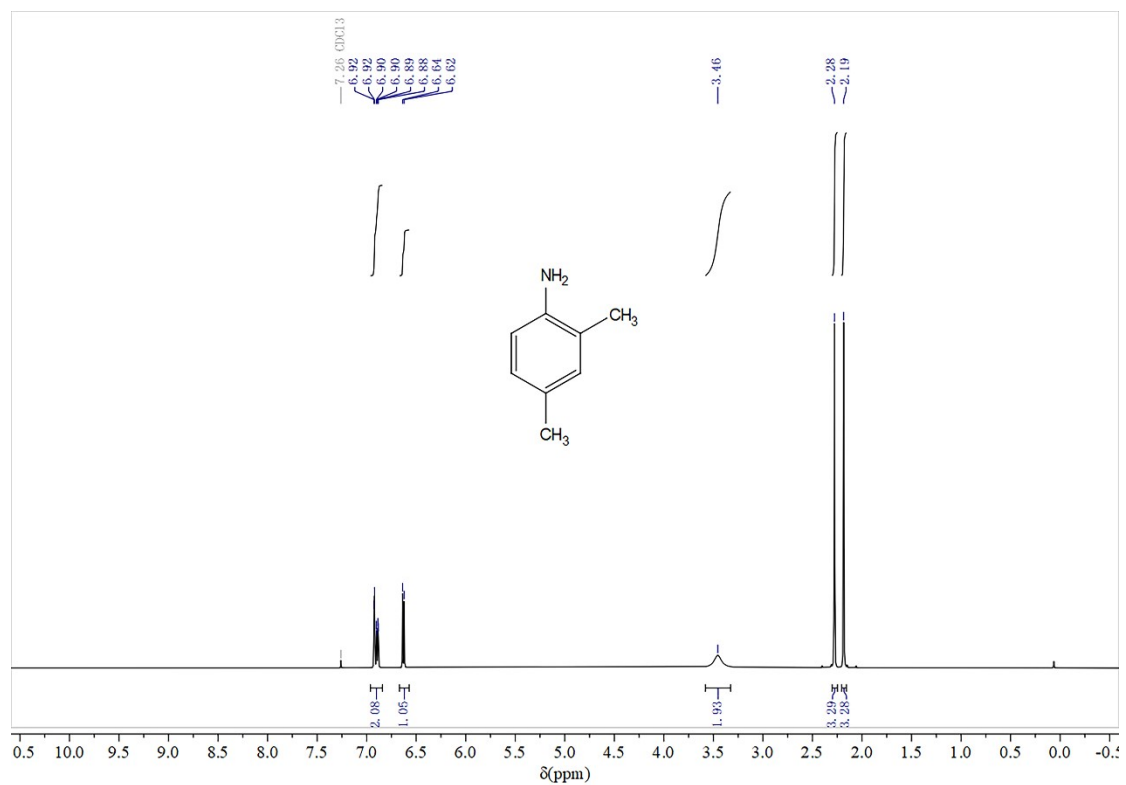

<sup>1</sup>H NMR (500 MHz, Chloroform-*d*) δ 7.05 – 6.79 (m, 1H),  
6.63 (d,  $J = 7.9$  Hz, 1H), 3.46 (s, 1H), 2.28 (s, 2H), 2.19 (s,  
2H).

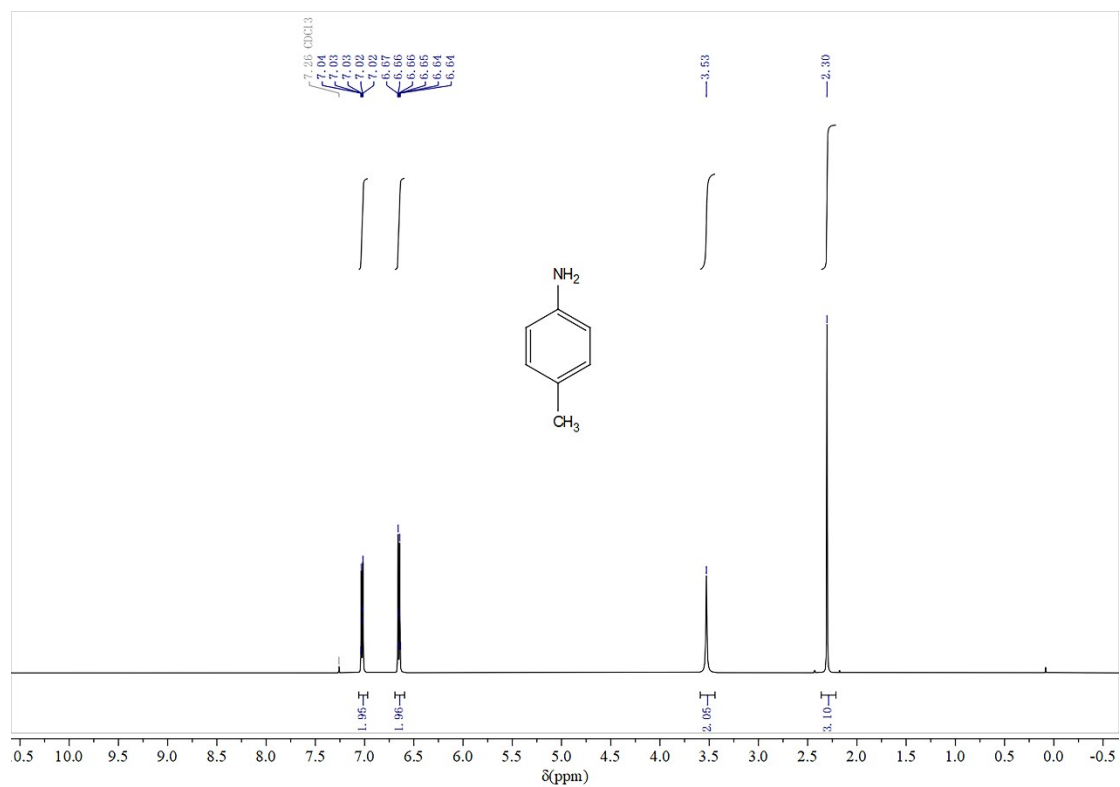

$^1\text{H}$  NMR (500 MHz, Chloroform-*d*)  $\delta$  7.06 – 7.00 (m, 1H),  
6.72 – 6.60 (m, 1H), 3.53 (s, 1H), 2.30 (s, 2H).

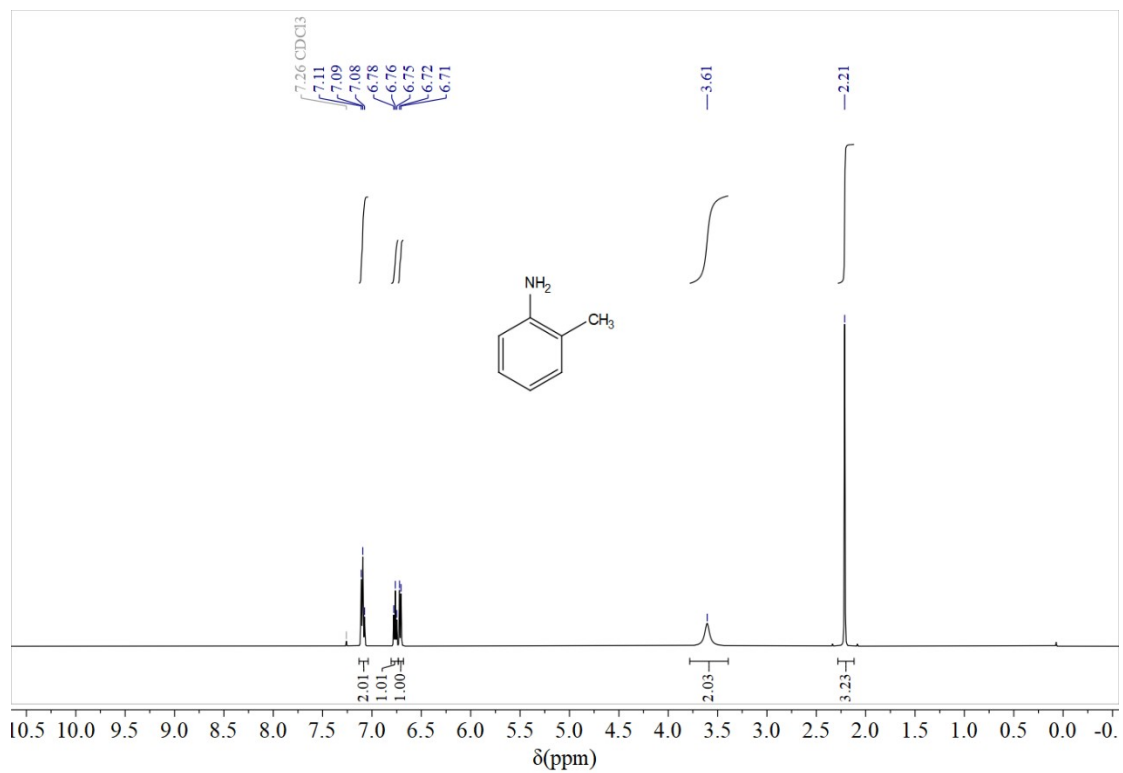

$^1\text{H}$  NMR (500 MHz, Chloroform-*d*)  $\delta$  7.09 (t,  $J = 8.2$  Hz, 1H), 6.76 (t,  $J = 7.4$  Hz, 1H), 6.71 (d,  $J = 7.8$  Hz, 1H), 3.61 (s, 1H), 2.21 (s, 1H).

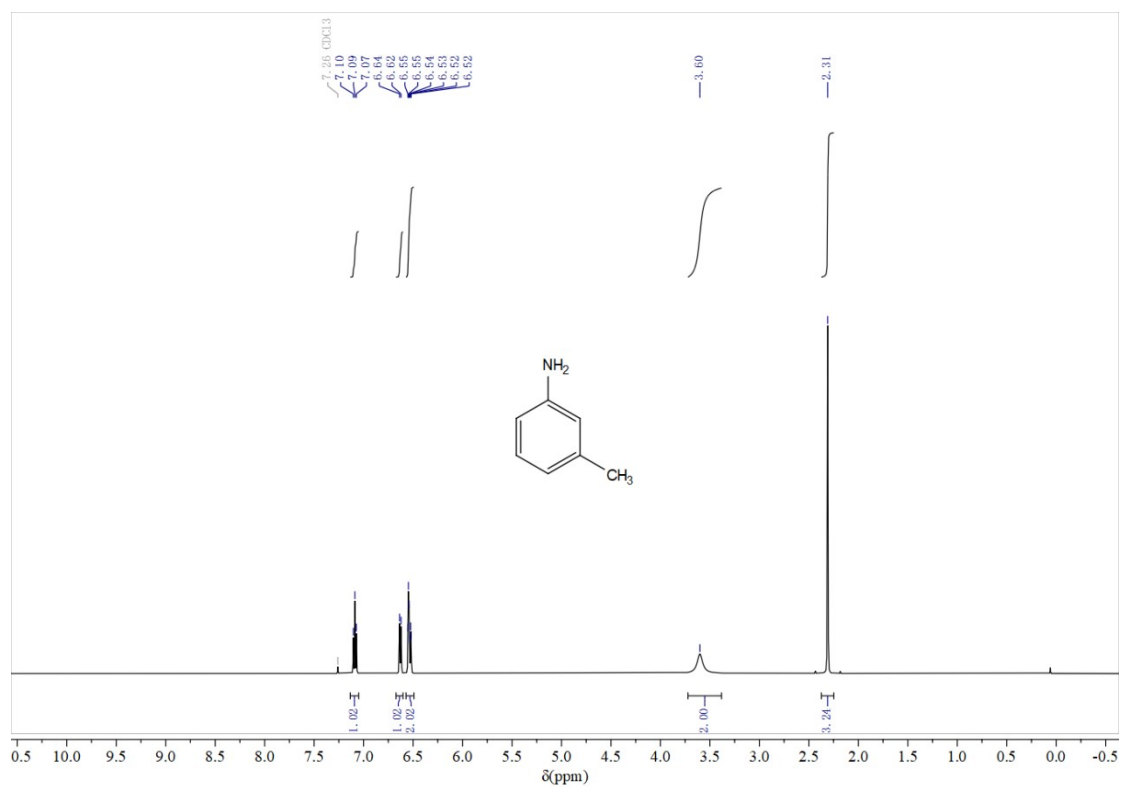

<sup>1</sup>H NMR (500 MHz, Chloroform-*d*) δ 7.09 (t,  $J = 7.6$  Hz, 1H),  
6.63 (d,  $J = 7.5$  Hz, 1H), 6.59 – 6.47 (m, 2H), 3.60 (s, 2H),  
2.31 (s, 3H).

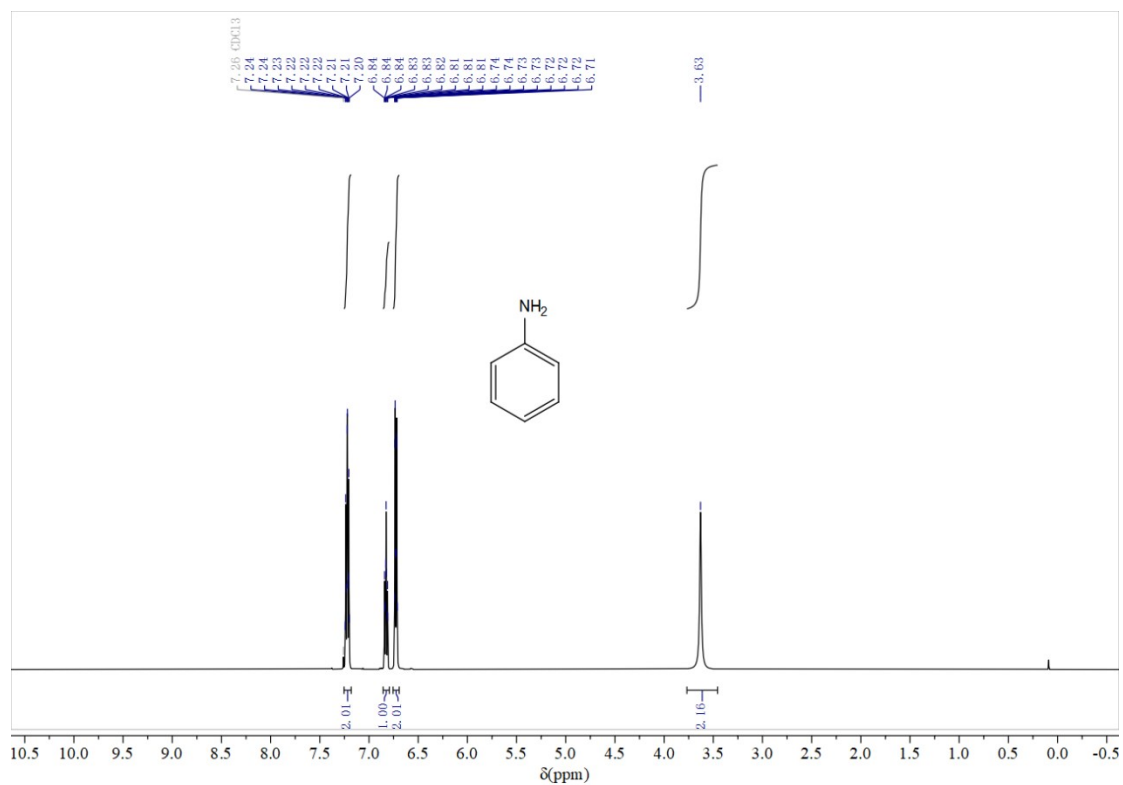

<sup>1</sup>H NMR (500 MHz, Chloroform-*d*) δ 7.27 – 7.17 (m, 1H),  
 6.83 (tt, *J* = 7.3, 1.2 Hz, 1H), 6.73 (dq, *J* = 8.9, 1.9 Hz,  
 1H), 3.63 (s, 1H).

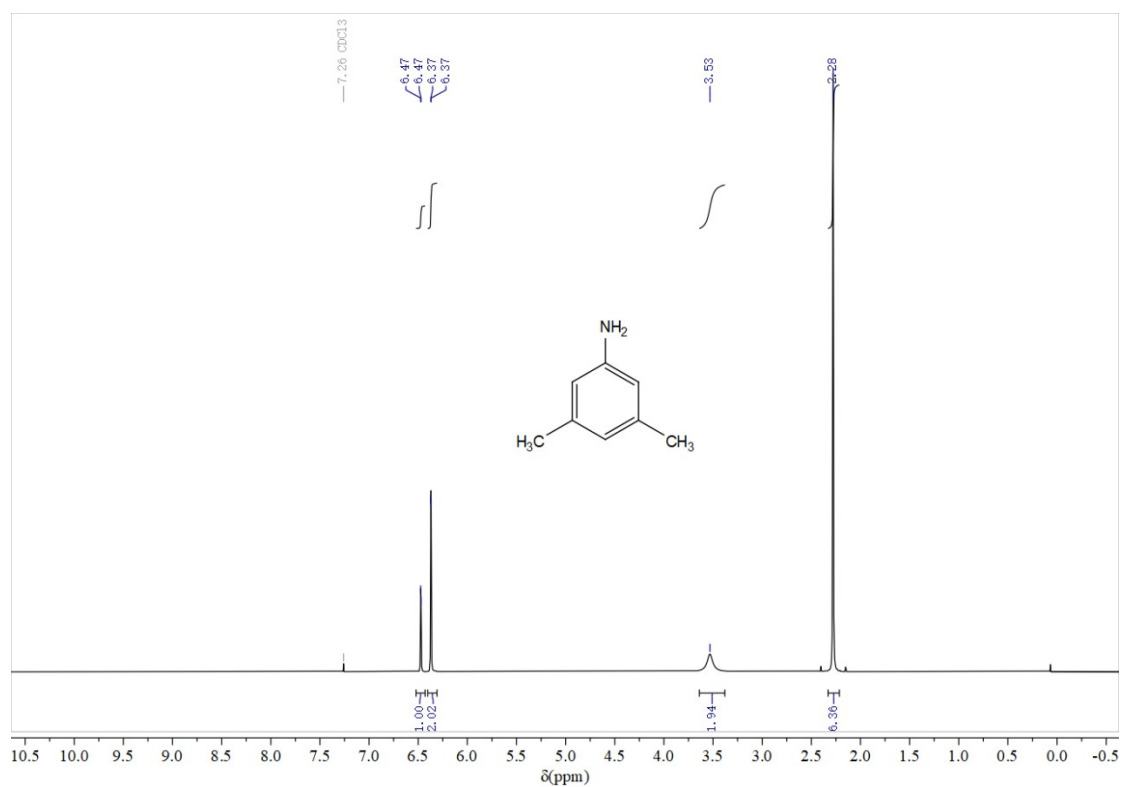

$^1\text{H}$  NMR (500 MHz, Chloroform-*d*)  $\delta$  6.47 (d,  $J = 1.9$  Hz, 1H),  
6.37 (d,  $J = 1.6$  Hz, 2H), 3.53 (s, 2H), 2.28 (s, 5H).

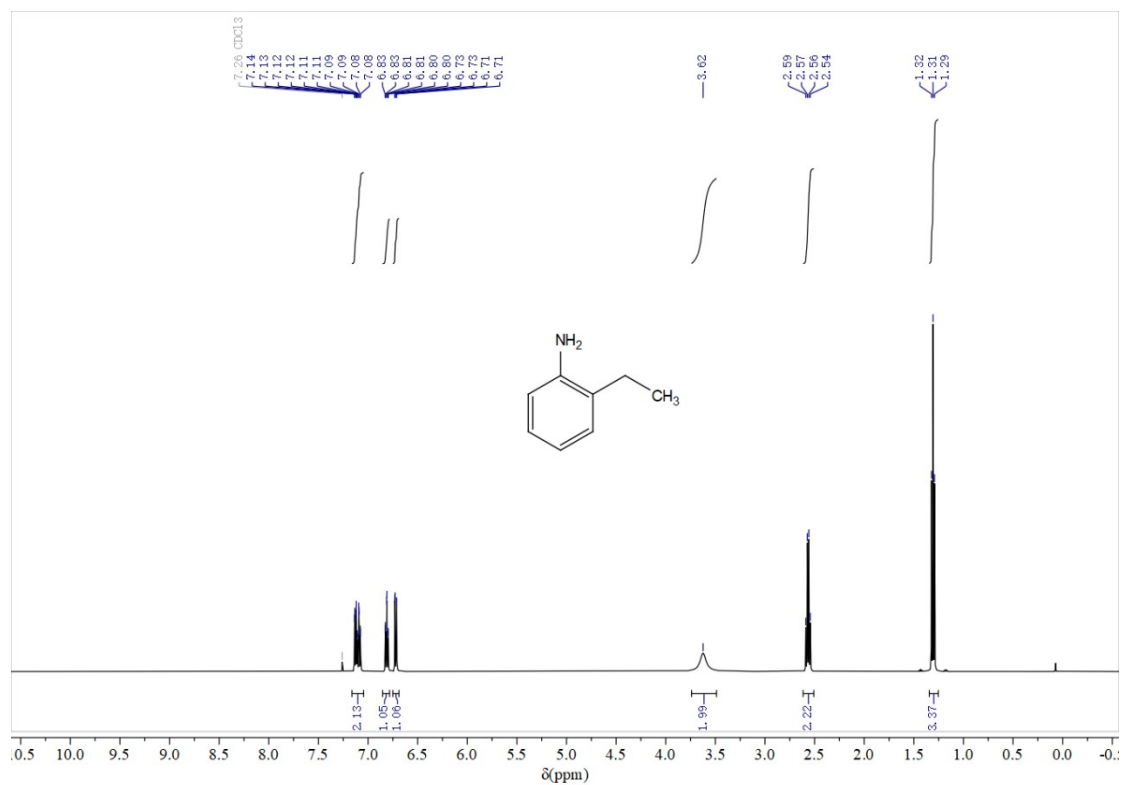

$^1\text{H}$  NMR (500 MHz, Chloroform-*d*)  $\delta$  7.16 – 7.05 (m, 1H), 6.81 (td,  $J = 7.4, 1.3$  Hz, 0H), 6.72 (dd,  $J = 8.0, 1.3$  Hz, 0H), 3.62 (s, 1H), 2.57 (q,  $J = 7.6$  Hz, 1H), 1.31 (t,  $J = 7.6$  Hz, 1H).

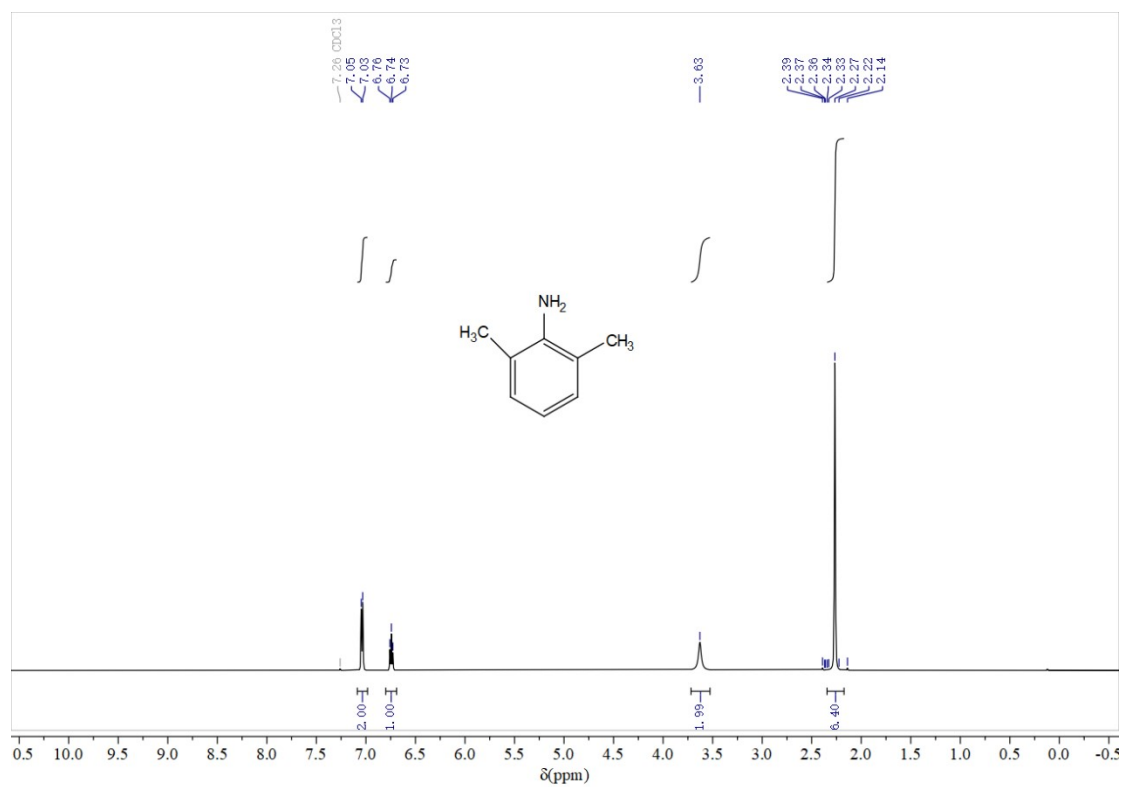

<sup>1</sup>H NMR (500 MHz, Chloroform-*d*)  $\delta$  7.04 (d,  $J = 7.5$  Hz, 1H),  
 6.74 (t,  $J = 7.5$  Hz, 1H), 3.63 (s, 1H), 2.27 (s, 3H).
